# Supplementary material
Source: ML conference proceedings conference paper supplement (https://openaccess.thecvf.com/content/CVPR_2020/html/Zhou_DuDoRNet_Learning_a_CVPR_2020_paper.html)
Supplement: Supplementary file 1 [file Zhou_DuDoRNet_Learning_a_CVPR_2020_supplemental.pdf]

# Supplemental Materials

## 1. FLAIR Reconstruction

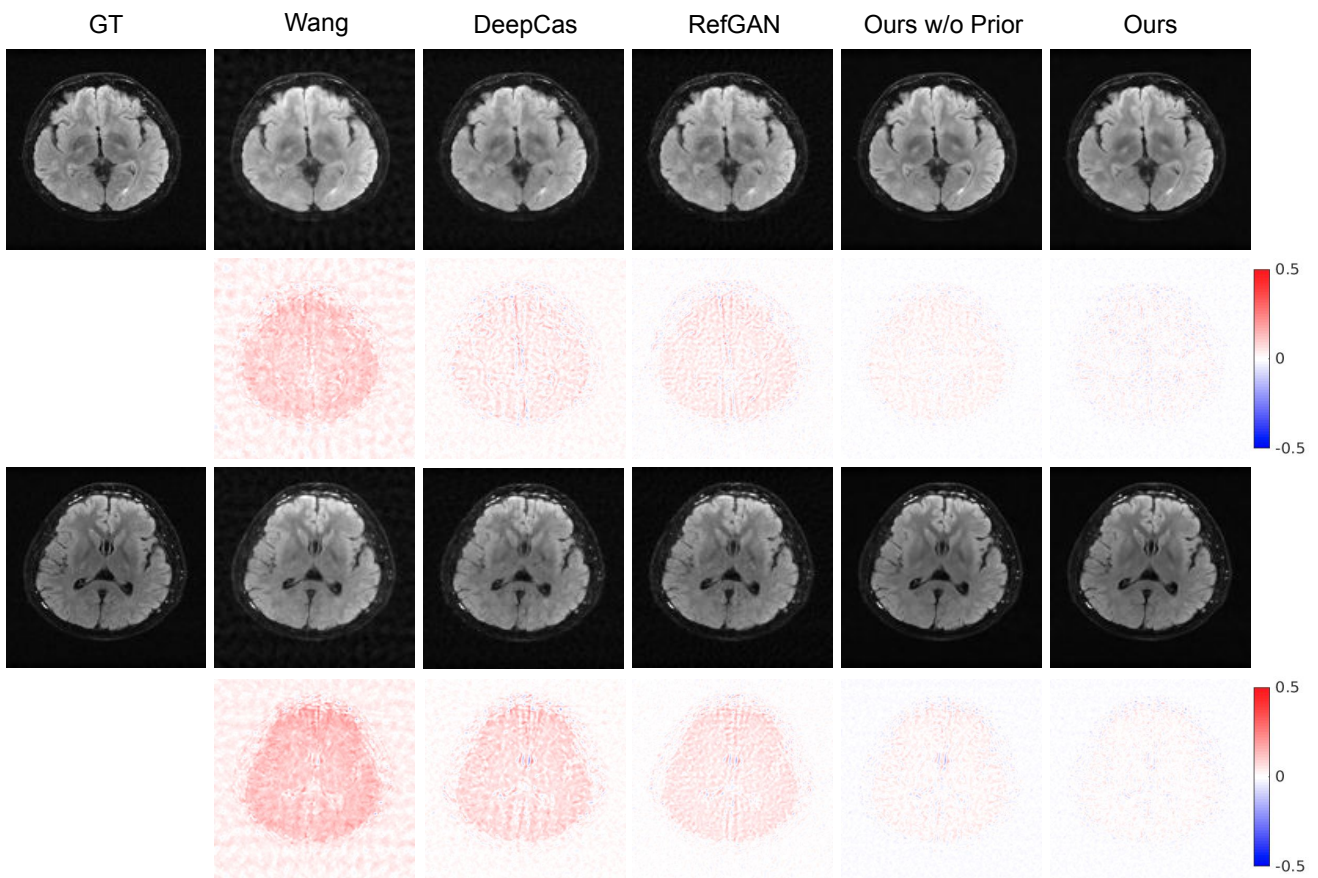

Figure 1: Comparison of reconstructions using radial trajectory at an acceleration rate  $R = 5$ .

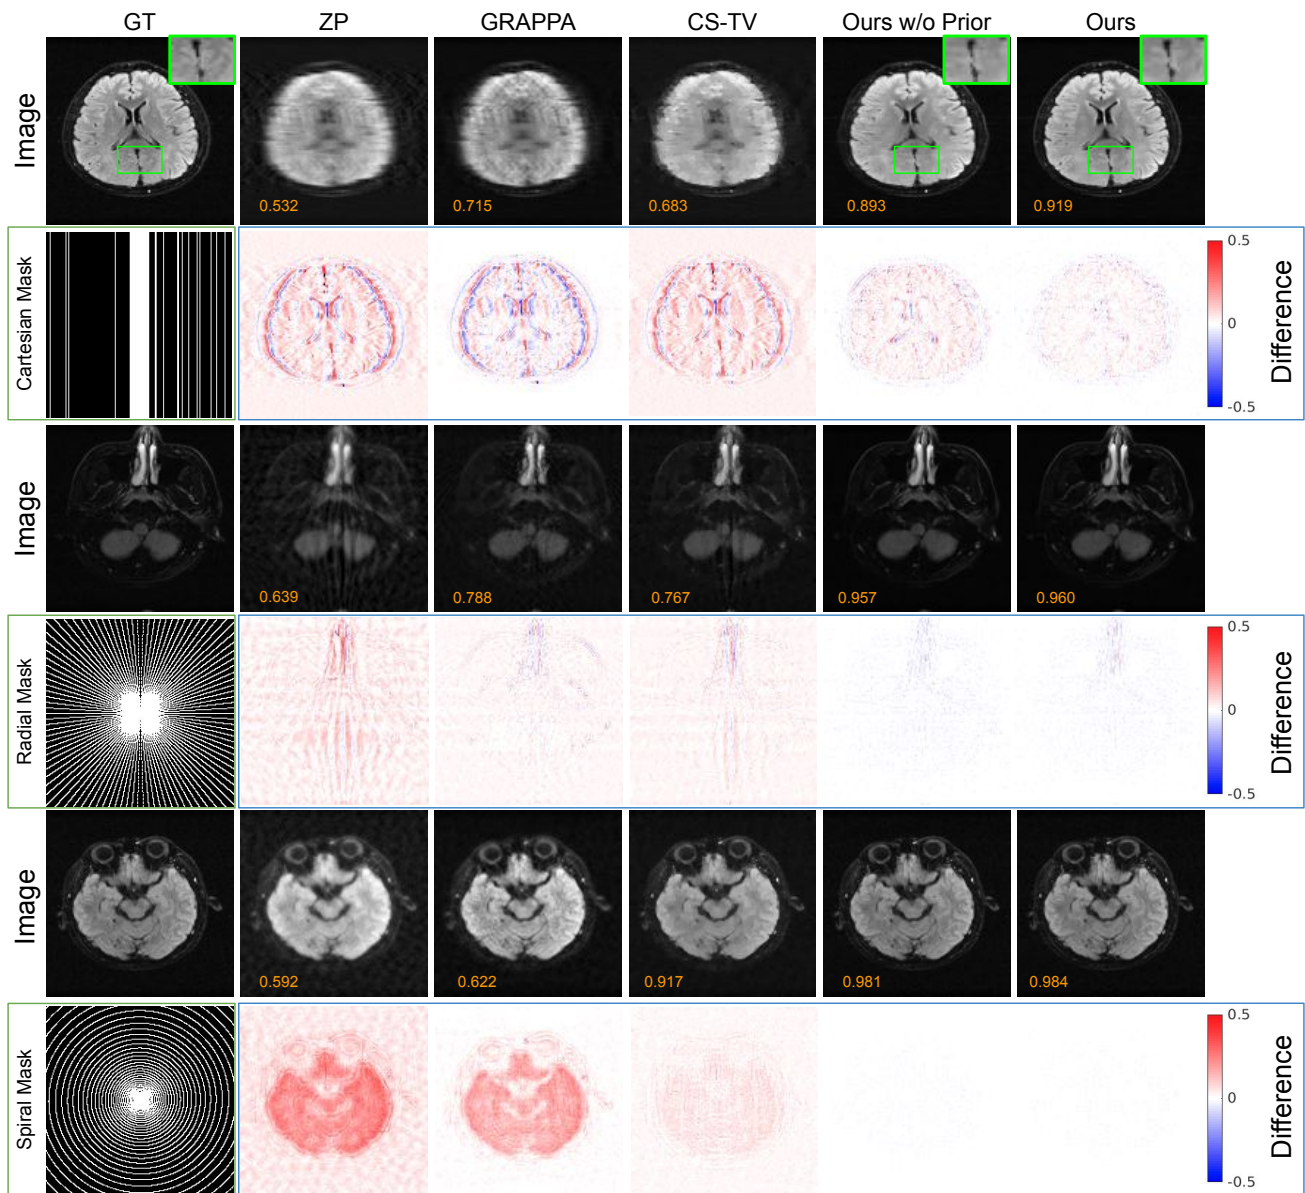

Figure 2: Reconstruction results from Cartesian/Radial/Spiral trajectory at under-sampling rate  $R = 5$ . The sampling pattern mask and difference images are shown on the second, fourth, and sixth row. Red boxes illustrate the enlarged views on details. The SSIM is indicated on the bottom left of the image.

Table 1: Quantitative comparison of FLAIR reconstructions from different undersampling patterns and methods at R = 5. Best results with and without T1 prior are marked in red and blue, respectively.

|                      |        |           |        |         |            |           |                |        |
|----------------------|--------|-----------|--------|---------|------------|-----------|----------------|--------|
| Cartesian            | ZP     | GRAPPA[1] | TV[2]  | Wang[5] | DeepCas[4] | RefGAN[3] | Ours w/o Prior | Ours   |
| PSNR [dB]            | 20.110 | 22.737    | 21.373 | 23.275  | 27.853     | 27.991    | 29.063         | 30.562 |
| SSIM                 | 0.608  | 0.733     | 0.696  | 0.772   | 0.864      | 0.868     | 0.889          | 0.914  |
| MSE( $\times 10^2$ ) | 1.241  | 0.701     | 0.949  | 0.682   | 0.217      | 0.201     | 0.165          | 0.106  |
| Radial               | ZP     | GRAPPA    | TV     | Wang    | DeepCas    | RefGAN    | Ours w/o Prior | Ours   |
| PSNR [dB]            | 20.178 | 24.920    | 23.685 | 29.201  | 32.955     | 32.04     | 35.834         | 36.369 |
| SSIM                 | 0.522  | 0.742     | 0.699  | 0.879   | 0.922      | 0.919     | 0.943          | 0.951  |
| MSE( $\times 10^2$ ) | 1.268  | 0.541     | 0.561  | 0.108   | 0.038      | 0.071     | 0.028          | 0.026  |
| Spiral               | ZP     | GRAPPA    | TV     | Wang    | DeepCas    | RefGAN    | Ours w/o Prior | Ours   |
| PSNR [dB]            | 22.602 | 29.324    | 32.836 | 34.987  | 40.287     | 36.881    | 43.740         | 43.988 |
| SSIM                 | 0.737  | 0.896     | 0.917  | 0.922   | 0.971      | 0.963     | 0.983          | 0.987  |
| MSE( $\times 10^2$ ) | 0.857  | 0.291     | 0.064  | 0.048   | 0.011      | 0.021     | 0.005          | 0.004  |

## References

- [1] Mark A Griswold, Peter M Jakob, Robin M Heidemann, Mathias Nittka, Vladimir Jellus, Jianmin Wang, Berthold Kiefer, and Axel Haase. Generalized autocalibrating partially parallel acquisitions (grappa). *Magnetic Resonance in Medicine: An Official Journal of the International Society for Magnetic Resonance in Medicine*, 47(6):1202–1210, 2002. 3
- [2] Shiqian Ma, Wotao Yin, Yin Zhang, and Amit Chakraborty. An efficient algorithm for compressed mr imaging using total variation and wavelets. In *2008 IEEE Conference on Computer Vision and Pattern Recognition*, pages 1–8. IEEE, 2008. 3
- [3] Tran Minh Quan, Thanh Nguyen-Duc, and Won-Ki Jeong. Compressed sensing mri reconstruction using a generative adversarial network with a cyclic loss. *IEEE transactions on medical imaging*, 37(6):1488–1497, 2018. 3
- [4] Jo Schlemper, Jose Caballero, Joseph V Hajnal, Anthony N Price, and Daniel Rueckert. A deep cascade of convolutional neural networks for dynamic mr image reconstruction. *IEEE transactions on Medical Imaging*, 37(2):491–503, 2017. 3
- [5] Shanshan Wang, Zhenghang Su, Leslie Ying, Xi Peng, Shun Zhu, Feng Liang, Dagan Feng, and Dong Liang. Accelerating magnetic resonance imaging via deep learning. In *2016 IEEE 13th International Symposium on Biomedical Imaging (ISBI)*, pages 514–517. IEEE, 2016. 3
